# Supplementary material for: Altered Functional Connectivity within and between Brain Modules in Absence Epilepsy: A Resting-State Functional Magnetic Resonance Imaging Study
Source: Hindawi journal article supplement (doi:10.1155/2013/734893), 2013-01-01

**A**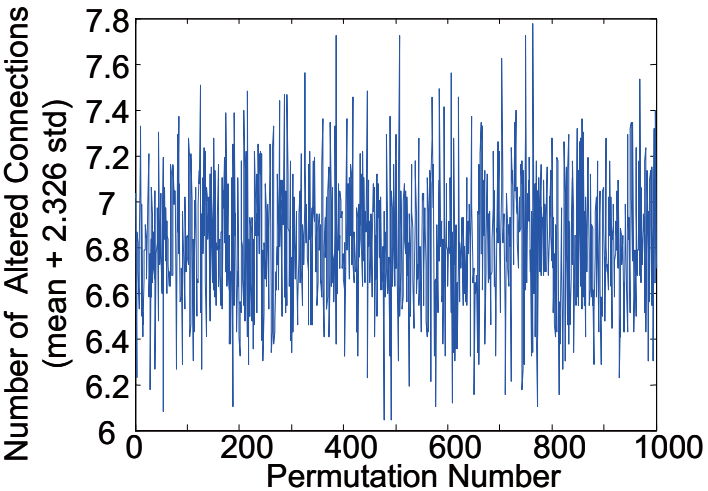**B**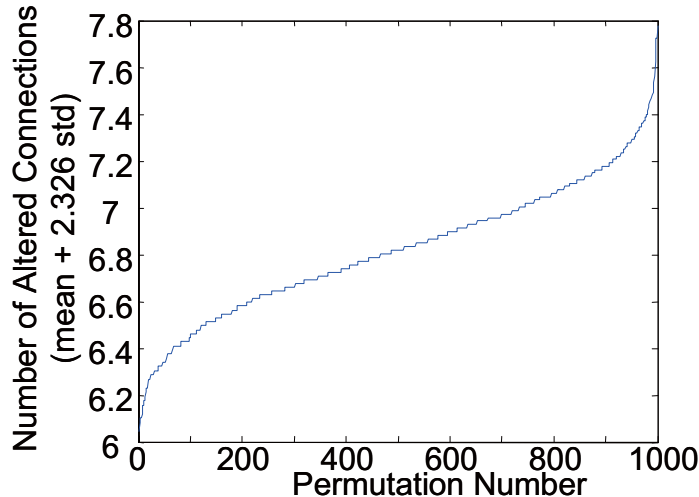

Supplement: f1 [file 734893.f1.pdf]
