# Supplementary material for: Altered Functional Connectivity within and between Brain Modules in Absence Epilepsy: A Resting-State Functional Magnetic Resonance Imaging Study
Source: Hindawi journal article supplement (doi:10.1155/2013/734893), 2013-01-01
Supplement: f3 [file 734893.f3.pdf]

Nodes with altered connections > 6

Sagittal view

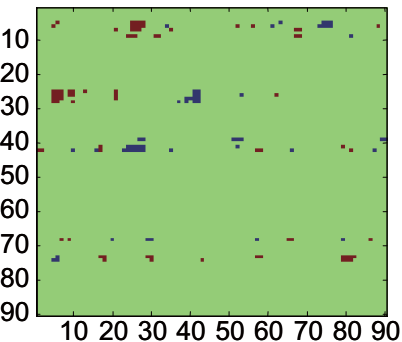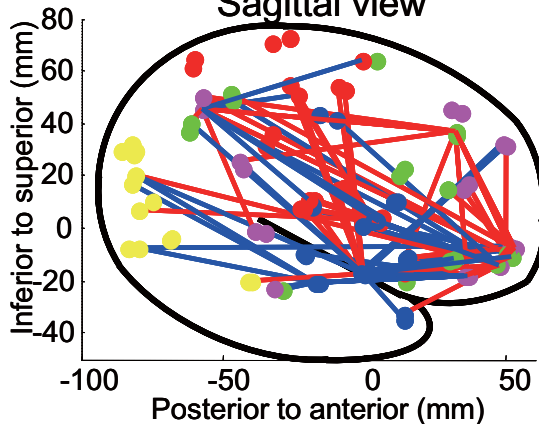

Top view

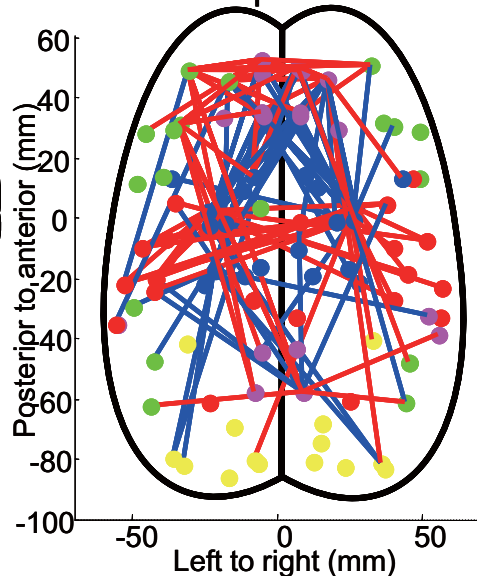

- Somatosensory, motor and auditory module
- Visual processing module
- Attention processing module
- Limbic/paralimbic, subcortical network
- Default mode network
