# Supplementary material for: Altered Functional Connectivity within and between Brain Modules in Absence Epilepsy: A Resting-State Functional Magnetic Resonance Imaging Study
Source: Hindawi journal article supplement (doi:10.1155/2013/734893), 2013-01-01

# All frontal DMN nodes

## Sagittal view

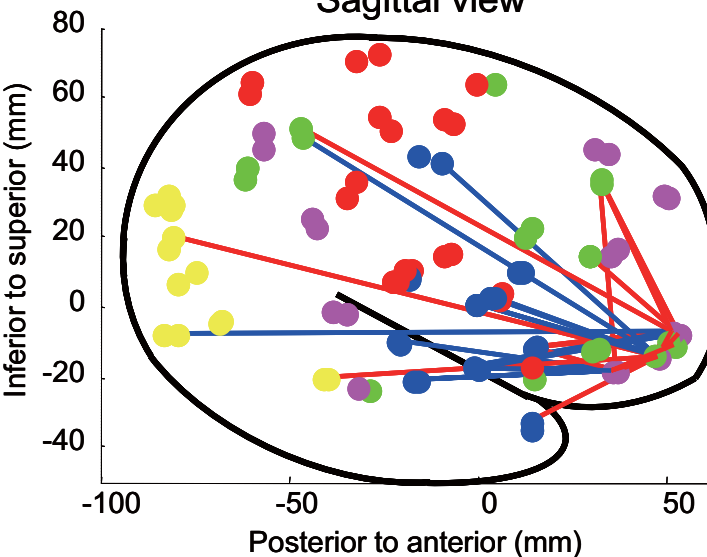

- Somatosensory, motor and auditory module
- Visual processing module
- Attention processing module
- Limbic/paralimbic, subcortical network
- Default mode network

## Top view

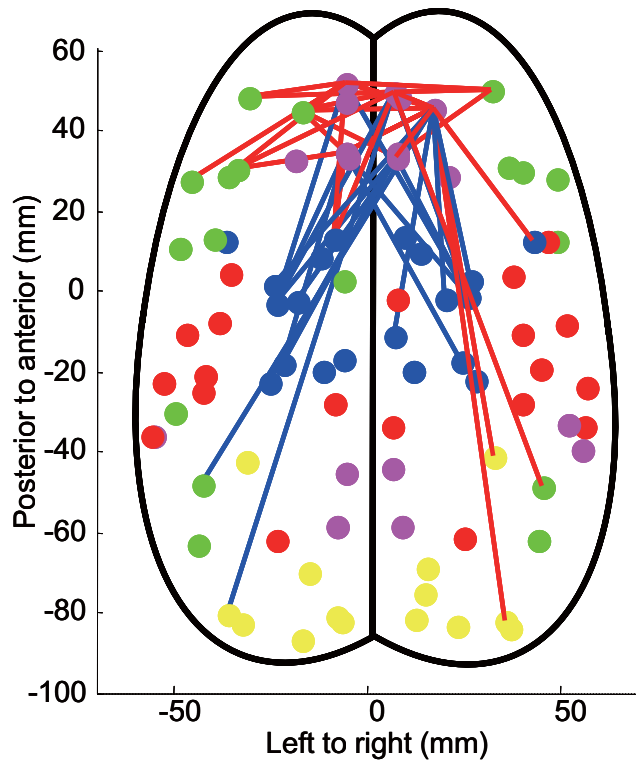

Supplement: f4 [file 734893.f4.pdf]
