# Supplementary material for: Altered Functional Connectivity within and between Brain Modules in Absence Epilepsy: A Resting-State Functional Magnetic Resonance Imaging Study
Source: Hindawi journal article supplement (doi:10.1155/2013/734893), 2013-01-01

**A**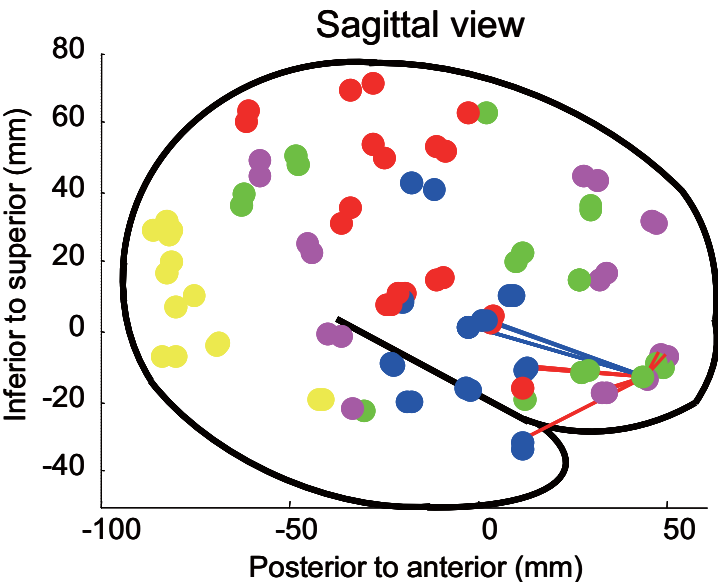

- Somatosensory, motor and auditory module
- Visual processing module
- Attention processing module
- Limbic/paralimbic, subcortical network
- Default mode network

**B**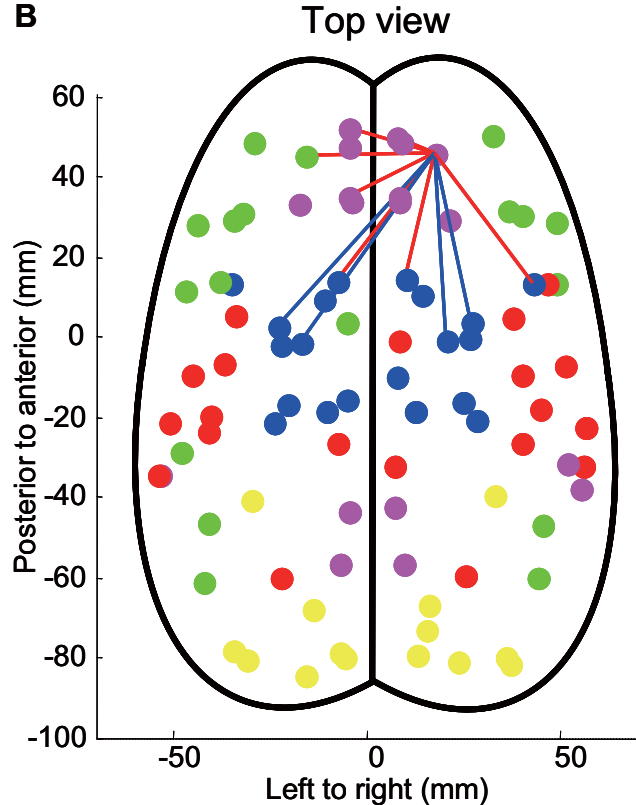

Supplement: f7 [file 734893.f7.pdf]
