# Supplementary material for: Altered Functional Connectivity within and between Brain Modules in Absence Epilepsy: A Resting-State Functional Magnetic Resonance Imaging Study
Source: Hindawi journal article supplement (doi:10.1155/2013/734893), 2013-01-01

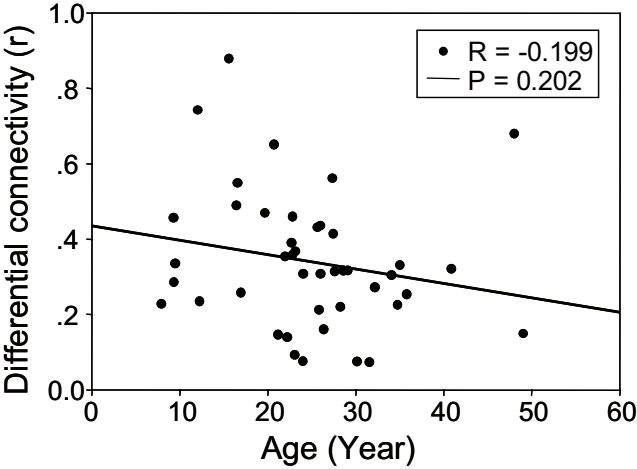

Supplement: f8 [file 734893.f8.pdf]
